# Supplementary material
Source: Springer Nature journal article supplement (https://www.springermedizin.de/resource/supplementary/12885_2012_3682_MOESM4_ESM.pdf/9464144)
Supplement: MOESM4 [file 9464144]

**Supplementary table 3****Presentation of DTC status (at all performed time points), endocrine treatment and trastuzumab treatment status for BM1 and/or BM2 positive patients**

---

| Patient Number | BM1 | BM2 | BM3 | BM4 | Endocrine treatment | Trastuzumab |
|----------------|-----|-----|-----|-----|---------------------|-------------|
| 5              | Pos | Neg |     |     | No                  | No          |
| 7              | Pos | Neg |     |     | No                  | No          |
| 12             | Pos | Neg |     |     | Yes                 | No          |
| 13             | Pos | Neg |     |     | No                  | No          |
| 16             | Pos | Neg |     |     | Yes                 | No          |
| 17             | Pos | Neg |     |     | Yes                 | No          |
| 26             | Pos | Neg |     |     | Yes                 | No          |
| 42             | Pos | Neg |     |     | Yes                 | No          |
| 55             | Pos | Neg |     |     | Yes                 | No          |
| 69             | Pos | Neg |     |     | Yes                 | No          |
| 76             | Pos | Neg |     |     | Yes                 | No          |
| 80             | Pos | Neg |     |     | Yes                 | No          |
| 81             | Pos | Neg |     |     | Yes                 | No          |
| 122            | Pos | Neg |     |     | No                  | No          |
| 139            | Pos | Neg |     |     | Yes                 | No          |
| 150            | Pos | Neg |     |     | Yes                 | No          |
| 173            | Pos | Neg |     |     | Yes                 | No          |
| 174            | Pos | Neg |     |     | Yes                 | No          |
| 209            | Pos | Neg |     |     | No                  | No          |
| 210            | Pos | Neg |     |     | Yes                 | No          |
| 238            | Pos | Neg |     |     | No                  | No          |
| 254            | Pos | Neg |     |     | No                  | Yes         |
| 269            | Pos | Neg |     |     | Yes                 | No          |
| 289            | Pos | Neg |     |     | Yes                 | No          |
| 323            | Pos | Neg |     |     | Yes                 | No          |
| 331            | Pos | Neg |     |     | Yes                 | No          |
| 339            | Pos | Neg |     |     | Yes                 | Unknown     |
| 346            | Pos | Neg |     |     | Yes                 | No          |
| 348            | Pos | Neg |     |     | No                  | No          |
| 353            | Pos | Neg |     |     | Yes                 | No          |
| 365            | Pos | Neg |     |     | Yes                 | No          |
| 374            | Pos | Neg |     |     | Yes                 | No          |
| 392            | Pos | Neg |     |     | Yes                 | No          |
| 413            | Pos | Neg |     |     | No                  | No          |
| 432            | Pos | Neg |     |     | Yes                 | No          |
| 437            | Pos | Neg |     |     | Yes                 | Unknown     |
| 450            | Pos | Neg |     |     | Yes                 | No          |
| 454            | Pos | Neg |     |     | Yes                 | No          |

|      |     |     |               |               |     |     |
|------|-----|-----|---------------|---------------|-----|-----|
| 468  | Pos | Neg |               |               | Yes | No  |
| 486  | Pos | Neg |               |               | Yes | No  |
| 492  | Pos | Neg |               |               | Yes | No  |
| 571  | Pos | Neg |               |               | Yes | Yes |
| 574  | Pos | Neg |               |               | Yes | No  |
| 608  | Pos | Neg |               |               | Yes | No  |
| 628  | Pos | Neg |               |               | Yes | No  |
| 642  | Pos | Neg |               |               | Yes | No  |
| 659  | Pos | Neg |               |               | .   | No  |
| 667  | Pos | Neg |               |               | Yes | No  |
| 680  | Pos | Neg |               |               | Yes | No  |
| 685  | Pos | Neg |               |               | Yes | No  |
| 686  | Pos | Neg |               |               | Yes | No  |
| 709  | Pos | Neg |               |               | Yes | No  |
| 714  | Pos | Neg |               |               | No  | Yes |
| 732  | Pos | Neg |               |               | No  | No  |
| 736  | Pos | Neg |               |               | Yes | No  |
| 739  | Pos | Neg |               |               | Yes | No  |
| 763  | Pos | Neg |               |               | Yes | No  |
| 764  | Pos | Neg |               |               | Yes | No  |
| 774  | Pos | Neg |               |               | Yes | Yes |
| 809  | Pos | Neg |               |               | Yes | No  |
| 816  | Pos | Neg |               |               | Yes | No  |
| 820  | Pos | Neg |               |               | No  | No  |
| 822  | Pos | Neg |               |               | Yes | Yes |
| 867  | Pos | Neg |               |               | Yes | No  |
| 872  | Pos | Neg |               |               | Yes | No  |
| 886  | Pos | Neg |               |               | Yes | No  |
| 914  | Pos | Neg |               |               | Yes | No  |
| 926  | Pos | Neg |               |               | Yes | No  |
| 946  | Pos | Neg |               |               | Yes | No  |
| 950  | Pos | Neg |               |               | Yes | No  |
| 971  | Pos | Neg |               |               | Yes | No  |
| 976  | Pos | Neg |               |               | No  | Yes |
| 1026 | Pos | Neg |               |               | No  | No  |
| 1033 | Pos | Neg |               |               | Yes | No  |
| 1053 | Pos | Neg |               |               | No  | No  |
| 1063 | Pos | Neg |               |               | No  | No  |
| 1066 | Pos | Neg |               |               | Yes | No  |
| 1087 | Pos | Neg |               |               | Yes | Yes |
| 1109 | Pos | Neg |               |               | Yes | No  |
| 79   | Pos | Pos | Neg           | Neg           | Yes | No  |
| 97   | Pos | Pos | Not performed | Not performed | Yes | No  |

|      |     |     |               |               |         |         |
|------|-----|-----|---------------|---------------|---------|---------|
| 117  | Pos | Pos | Neg           | Neg           | Yes     | No      |
| 170  | Pos | Pos | Not performed | Not performed | Yes     | No      |
| 366  | Pos | Pos | Pos           | Not evaluable | No      | No      |
| 440  | Pos | Pos | Not performed | Pos           | Yes     | No      |
| 562  | Pos | Pos | Pos           | Not performed | No      | No      |
| 677  | Pos | Pos | Neg           | Neg           | Yes     | No      |
| 695  | Pos | Pos | Neg           | Pos           | Yes     | No      |
| 878  | Pos | Pos | Neg           | Neg           | Yes     | Yes     |
| 751  | Pos | Pos | Neg           | Not performed | Yes     | No      |
| 1045 | Pos | Pos | Neg           | Neg           | Yes     | No      |
| 1054 | Pos | Pos | Neg           | Neg           | Yes     | No      |
| 1061 | Pos | Pos | Pos           | Not performed | Yes     | No      |
| 1122 | Pos | Pos | Neg           | Pos           | Yes     | No      |
| 20   | Neg | Pos | Neg           | Neg           | No      | No      |
| 32   | Neg | Pos | Neg           | Neg           | Unknown | No      |
| 33   | Neg | Pos | Neg           | Neg           | Yes     | No      |
| 35   | Neg | Pos | Neg           | Neg           | Yes     | No      |
| 39   | Neg | Pos | Neg           | Neg           | Yes     | No      |
| 40   | Neg | Pos | Pos           | Neg           | Yes     | No      |
| 44   | Neg | Pos | Neg           | Neg           | Yes     | No      |
| 45   | Neg | Pos | Pos           | Neg           | No      | No      |
| 47   | Neg | Pos | Neg           | Not performed | No      | No      |
| 65   | Neg | Pos | Neg           | Neg           | Yes     | No      |
| 86   | Neg | Pos | Neg           | Pos           | Yes     | No      |
| 96   | Neg | Pos | Neg           | Pos           | Yes     | No      |
| 98   | Neg | Pos | Neg           | Pos           | Yes     | No      |
| 115  | Neg | Pos | Neg           | Neg           | Yes     | No      |
| 128  | Neg | Pos | Neg           | Neg           | Yes     | No      |
| 171  | Neg | Pos | Neg           | Neg           | No      | No      |
| 181  | Neg | Pos | Neg           | Not evaluable | Yes     | No      |
| 185  | Neg | Pos | Pos           | Pos           | No      | No      |
| 195  | Neg | Pos | Pos           | Pos           | No      | No      |
| 202  | Neg | Pos | Pos           | Not performed | Yes     | No      |
| 205  | Neg | Pos | Neg           | Neg           | No      | No      |
| 236  | Neg | Pos | Neg           | Neg           | Yes     | No      |
| 243  | Neg | Pos | Not performed | Not performed | Yes     | No      |
| 251  | Neg | Pos | Neg           | Pos           | Yes     | No      |
| 259  | Neg | Pos | Neg           | Neg           | No      | No      |
| 267  | Neg | Pos | Neg           | Neg           | Yes     | No      |
| 277  | Neg | Pos | Neg           | Neg           | Yes     | No      |
| 278  | Neg | Pos | Pos           | Neg           | Yes     | Unknown |
| 280  | Neg | Pos | Pos           | Not performed | Yes     | No      |
| 311  | Neg | Pos | Neg           | Neg           | Unknown | No      |

|      |     |     |               |               |         |     |
|------|-----|-----|---------------|---------------|---------|-----|
| 342  | Neg | Pos | Neg           | Neg           | No      | No  |
| 343  | Neg | Pos | Not performed | Not performed | Unknown | No  |
| 383  | Neg | Pos | Not performed | Not performed | Yes     | No  |
| 396  | Neg | Pos | Neg           | Neg           | No      | Yes |
| 477  | Neg | Pos | Not performed | Not performed | No      | No  |
| 512  | Neg | Pos | Neg           | Neg           | Yes     | Yes |
| 569  | Neg | Pos | Not performed | Not performed | No      | Yes |
| 578  | Neg | Pos | Neg           | Neg           | Yes     | No  |
| 587  | Neg | Pos | Not performed | Not performed | No      | No  |
| 601  | Neg | Pos | Neg           | Neg           | Yes     | No  |
| 613  | Neg | Pos | Neg           | Neg           | Yes     | No  |
| 630  | Neg | Pos | Pos           | Neg           | No      | No  |
| 648  | Neg | Pos | Neg           | Neg           | No      | No  |
| 661  | Neg | Pos | Neg           | Neg           | Yes     | No  |
| 669  | Neg | Pos | Neg           | Neg           | Yes     | No  |
| 708  | Neg | Pos | Neg           | Neg           | No      | No  |
| 740  | Neg | Pos | Neg           | Not evaluable | Yes     | No  |
| 755  | Neg | Pos | Neg           | Neg           | No      | No  |
| 766  | Neg | Pos | Neg           | Not performed | No      | Yes |
| 786  | Neg | Pos | Neg           | Neg           | Yes     | No  |
| 805  | Neg | Pos | Neg           | Neg           | Yes     | No  |
| 813  | Neg | Pos | Not performed | Not performed | Yes     | Yes |
| 821  | Neg | Pos | Neg           | Neg           | Yes     | No  |
| 839  | Neg | Pos | Neg           | Neg           | Unknown | Yes |
| 852  | Neg | Pos | Neg           | Neg           | Yes     | No  |
| 858  | Neg | Pos | Neg           | Neg           | Yes     | No  |
| 895  | Neg | Pos | Neg           | Neg           | No      | No  |
| 908  | Neg | Pos | Neg           | Neg           | Yes     | No  |
| 928  | Neg | Pos | Neg           | Neg           | No      | Yes |
| 929  | Neg | Pos | Neg           | Neg           | Yes     | No  |
| 964  | Neg | Pos | Not performed | Not performed | Yes     | No  |
| 983  | Neg | Pos | Neg           | Pos           | Yes     | No  |
| 1009 | Neg | Pos | Neg           | Not performed | Yes     | No  |
| 1031 | Neg | Pos | Pos           | Neg           | Yes     | No  |
| 1049 | Neg | Pos | Not performed | Not performed | Yes     | No  |
| 1062 | Neg | Pos | Neg           | Neg           | Yes     | No  |
| 1078 | Neg | Pos | Neg           | Pos           | Yes     | No  |
| 1100 | Neg | Pos | Neg           | Neg           | Yes     | No  |

---
